# Supplementary material for: Network Theory Analysis of Antibody-Antigen Reactivity Data: The Immune Trees at Birth and Adulthood
Source: PubMed Central journal article supplement (PMC3050881; doi:10.1371/journal.pone.0017445), 2011-03-08
Supplement: pone.0017445.s012.pdf [file pone.0017445.s012.pdf]

Supplemental Table 1. Complete list of antigens spotted on the antigen chip.

| Antigen                        | Description                       | Company  | CAT #       |
|--------------------------------|-----------------------------------|----------|-------------|
| a2-macroglobulin               |                                   | Sigma    | M6159       |
| Acetyl cholinesterase          |                                   | Sigma    | C2629       |
| Acid Phosphatase               | human prostatic                   | Sigma    | P1649       |
| a-Cristallin                   |                                   | Sigma    | C4163       |
| Actin                          | bovine muscle                     | Sigma    | A3653       |
| Albumin                        | Bovine, fraction V                | Sigma    | A9647       |
| Aldolase                       |                                   | Sigma    | A8811       |
| a-MSH                          | a-Melanocyte Stimulating Hormone  | Sigma    | M4135       |
| Annexin 33 kDa                 | hum placenta                      | Sigma    | A9460       |
| Annexin 67 kDa                 | bovine liver                      | Sigma    | A2824       |
| ANP                            | Atrial Natriuretic Peptide, human | Sigma    | A1663       |
| Anti human IgA -Cy 5           | Goat                              | Enco     | 109-175-011 |
| Anti human IgG+ IgM -Cy 3      |                                   | Enco     | 109-165-127 |
| Anti human IgM                 | Goat                              | Sigma    | I0759       |
| Anti human IgM -Cy 5           | Goat                              | Enco     | 109-175-043 |
| Anti mouse IL-4                | Purified, (capture)               | Bactolab | PMG554434   |
| b2-microglobulin               |                                   | Sigma    | M4890       |
| b-Cristallin                   |                                   | Sigma    | C6664       |
| Beta Amyloid 1-20              | Beta amyloid fragment 1-20        | Sigma    | A7723       |
| Big Gastrin                    | I, human                          | Sigma    | G5024       |
| Biot. Anti-mouse IL-12 P40/P70 |                                   | Bactolab | PMG554476   |
| Beta Amyloid 17-40             | Beta amyloid fragment 17-40       | Sigma    | A4848       |
| b-MSH                          | b-Melanocyte Stimulating Hormone  | Sigma    | M6613       |
| BNP                            | Brain Natriuretic Peptide         | Sigma    | B6900       |
| BSA                            | Serum Albumin, bovine             | Sigma    | A7030       |

|                         |                                            |       |            |
|-------------------------|--------------------------------------------|-------|------------|
| C protein               | C-Reactive Protein                         | Sigma | C4063      |
| C1Q                     | Complement C1Q, human                      | Sigma | C1740      |
| C9                      | Complement C9, human                       | Sigma | C3660      |
| CA19-9                  |                                            | Enco  | 770962     |
| Cardiolipin             | from bovine heart                          | Sigma | C0563      |
| Cardiotoxin             |                                            | Sigma | C3987      |
| Cartilage Extract       | Bovine articular crt.                      | Sigma | C5210      |
| Caspase 3               | human                                      | Sigma | C1224      |
| Caspase 8               | human                                      | Sigma | C1099      |
| Catalase                | bovine liver                               | Sigma | C9322      |
| Cholesterol             | water soluble                              | Sigma | C1145      |
| Chorionic Gonadotrophin | human                                      | Sigma | C8554      |
| c-myc                   |                                            | Enco  | 26292-PO   |
| Collagen II             | bovine                                     | Sigma | C1188      |
| Collagen III            | from human placenta                        | Sigma | C4407      |
| Collagen IV             | from human placenta                        | Sigma | C7521      |
| Collagen IX             | from human placenta                        | Sigma | C3657      |
| Collagen VI             | from human placenta                        | Sigma | C7521      |
| Collagen VIII           | from human placenta                        | Sigma | C7774      |
| Collagen X              | from human placenta                        | Sigma | C4407      |
| Collagenase             | type 1A                                    | Sigma | C9891      |
| C-peptide               | human                                      | Sigma | C5051      |
| CRF                     | Corticotropin Releasing Factor, human, rat | Sigma | C3042      |
| CTLA4                   |                                            | Enco  | PHR5001    |
| Cyclin                  | Cyclin A                                   | Enco  | SC-4072-WB |
| Cyclophosphamide, mono  |                                            | Sigma | C0768      |
| Cytochrome C P450       | bovine heart                               | Sigma | C3131      |

|                  |                                           |         |              |
|------------------|-------------------------------------------|---------|--------------|
| Cytokeratin 8    |                                           | Enco    | 771022       |
| Cytokeratin 18   |                                           | Enco    | 771032       |
| DAP              | Diabetes Associated Peptide amide         | Sigma   | D2162        |
| Defensin         |                                           | Enco    | HDEFA15-R-10 |
| Digitonin        |                                           | Sigma   | D141         |
| dsDNA            | double stranded DNA                       | Sigma   | D1501        |
| EGF              | human, recom                              | Enco    | PHG0064      |
| elastase         | from human neutrophils                    | Enco    | 191337       |
| Endoproteinase   | Endoproteinase Clu-c, S. aureus           | Sigma   | P6181        |
| Endothelin 1     | human, porcine                            | Sigma   | E7764        |
| Endothelin 2     |                                           | Sigma   | E9012        |
| Enolase          | rabbit muscle                             | Sigma   | E0379        |
| Factor II        | Clotting Factor II, human                 | Sigma   | F5132        |
| Factor VII       | Clotting Factor VII, (proconvertin) human | Enco    | 194191       |
| Factor X         | Clotting Factor X, human                  | Enco    | 194195       |
| Fetuin           |                                           | Sigma   | F2379        |
| Fibrin           | washed from human plasma                  | Sigma   | F5386        |
| Fibrinogen       | hum plasma, essentially plasminogen free  | Sigma   | F3879        |
| Fibronectin      | .1% solution                              | Sigma   | F0895        |
| GAD              | Glutamic Acid Decarboxylase               | Sigma   | G2001        |
| GAD/p34          | >80% purirty                              | Sigma   |              |
| GAD/p35          | >80% purirty                              | Sigma   |              |
| galectin 3       | human                                     | Cytolab | 450-38-10    |
| Galectin1(Gal-1) | human                                     | Cytolab | 450-39-10    |
| Gastrin          | human, I                                  | Enco    | 152871       |
| Gelsolin         | from human plasma                         | Sigma   | G1538        |
| Gliadin          | from wheat gluten                         | Enco    | 101778       |

|                                        |                                        |       |        |
|----------------------------------------|----------------------------------------|-------|--------|
| Glucagon                               | human, bovine, porcine                 | Sigma | G1774  |
| Glucocerebroside                       | from human spleen                      | Sigma | G9884  |
| glyceraldehyde3phosphate dehydrogenase |                                        | Enco  | 100693 |
| g-MSH                                  | g-Melanocyte Stimulating Hormone       | Sigma | M9638  |
| GNRH                                   | Growth Hormone Releasing Factor, human | Sigma | G8895  |
| GpC                                    | >80% purirty                           | Sigma |        |
| GroEL (chaperonin 60E)                 | 65 kDa heat shock protein, E. coli     | Sigma | C7688  |
| GroEL/p1                               | / peptide 1                            | Sigma |        |
| GroEL/p10                              | / peptide 10                           | Sigma |        |
| GroEL/p11                              | / peptide 11                           | Sigma |        |
| GroEL/p12                              | / peptide 12                           | Sigma |        |
| GroEL/p13                              | / peptide 13                           | Sigma |        |
| GroEL/p14                              | / peptide 14                           | Sigma |        |
| GroEL/p15                              | / peptide 15                           | Sigma |        |
| GroEL/p16                              | / peptide 16                           | Sigma |        |
| GroEL/p17                              | / peptide 17                           | Sigma |        |
| GroEL/p18                              | / peptide 18                           | Sigma |        |
| GroEL/p19                              | / peptide 19                           | Sigma |        |
| GroEL/p2                               | / peptide 2                            | Sigma |        |
| GroEL/p20                              | / peptide 20                           | Sigma |        |
| GroEL/p21                              | / peptide 21                           | Sigma |        |
| GroEL/p22                              | / peptide 22                           | Sigma |        |
| GroEL/p23                              | / peptide 23                           | Sigma |        |
| GroEL/p24                              | / peptide 24                           | Sigma |        |
| GroEL/p25                              | / peptide 25                           | Sigma |        |
| GroEL/p26                              | / peptide 26                           | Sigma |        |
| GroEL/p28                              | / peptide 28                           | Sigma |        |

|                  |                                |       |          |
|------------------|--------------------------------|-------|----------|
| GroEL/p29        | / peptide 29                   | Sigma |          |
| GroEL/p3         | / peptide 3                    | Sigma |          |
| GroEL/p30        | / peptide 30                   | Sigma |          |
| GroEL/p31        | / peptide 31                   | Sigma |          |
| GroEL/p32        | / peptide 32                   | Sigma |          |
| GroEL/p33        | / peptide 33                   | Sigma |          |
| GroEL/p34        | / peptide 34                   | Sigma |          |
| GroEL/p35        | / peptide 35                   | Sigma |          |
| GroEL/p36        | / peptide 36                   | Sigma |          |
| GroEL/p37        | / peptide 37                   | Sigma |          |
| GroEL/p4         | / peptide 4                    | Sigma |          |
| GroEL/p5         | / peptide 5                    | Sigma |          |
| GroEL/p6         | / peptide 6                    | Sigma |          |
| GroEL/p7         | / peptide 7                    | Sigma |          |
| GroEL/p8         | / peptide 8                    | Sigma |          |
| GroEL/p9         | / peptide 9                    | Sigma |          |
| GST              | Glutathione-S-Transferase, hum | Sigma | G8642    |
| GSTase           | Galactosyltransferase          | Sigma | G5507    |
| HDL              | Lipoprotein, High Density      | Sigma | L1567    |
| Hemagglutinin    | fillamentous                   | Sigma | F5551    |
| Hemoglobin       | ferrous, hum                   | Sigma | H0267    |
| Heparin          | porcine intestinal mucosa      | Sigma | H3393    |
| hGST             | Glutathion-S-transferase human | Sigma | G8842    |
| Histone IIA      | unfractionated whole           | Sigma | H9250    |
| holo-transferase |                                | Enco  | 152335   |
| HSP27            | human recombinant              | Enco  | ESP-715G |
| HSP40            | recomb                         | Enco  | SPP-400B |

|               |                |       |       |
|---------------|----------------|-------|-------|
| HSP 47        | rat, recomb.   | Sigma | H8035 |
| HSP60/batch 2 | / batch 2      | Sigma | H8903 |
| HSP60/p1      | / peptide 1    | Sigma |       |
| HSP60/p10     | / peptide 10   | Sigma |       |
| HSP60/p12     | / peptide 12   | Sigma |       |
| HSP60/p14     | / peptide 14   | Sigma |       |
| HSP60/p16     | / peptide 16   | Sigma |       |
| HSP60/p18     | / peptide 18   | Sigma |       |
| HSP60/p19     | / peptide 19   | Sigma |       |
| HSP60/p2      | / peptide 2    | Sigma |       |
| HSP60/p22     | / peptide 22   | Sigma |       |
| HSP60/p23     | / peptide 23   | Sigma |       |
| HSP60/p25     | / peptide 25   | Sigma |       |
| HSP60/p26     | / peptide 26   | Sigma |       |
| HSP60/p27     | / peptide 27   | Sigma |       |
| HSP60/p277    | / peptide p277 | Sigma |       |
| HSP60/p28     | / peptide 28   | Sigma |       |
| HSP60/p29     | / peptide 29   | Sigma |       |
| HSP60/p30     | / peptide 30   | Sigma |       |
| HSP60/p32     | / peptide 32   | Sigma |       |
| HSP60/p33     | / peptide 33   | Sigma |       |
| HSP60/p34     | / peptide 34   | Sigma |       |
| HSP60/p35     | / peptide 35   | Sigma |       |
| HSP60/p36     | / peptide 36   | Sigma |       |
| HSP60/p37     | / peptide 37   | Sigma |       |
| HSP60/p38     | / peptide 38   | Sigma |       |
| HSP60/p4      | / peptide 4    | Sigma |       |

|            |                                                                  |       |          |
|------------|------------------------------------------------------------------|-------|----------|
| HSP60/p5   | / peptide 5                                                      | Sigma |          |
| HSP60/p6   | / peptide 6                                                      | Sigma |          |
| HSP60/p7   | / peptide 7                                                      | Sigma |          |
| HSP60/p8   | / peptide 8                                                      | Sigma |          |
| HSP60/p9   | / peptide 9                                                      | Sigma |          |
| HSP60/p24  | / peptide 24                                                     | Sigma |          |
| HSP65      | 65 kDa heat shock protein, (M. tuberculosis) M.<br>bovis instead | Enco  | NSP-581E |
| HSP65/p180 | / peptide 180                                                    | Sigma |          |
| HSP65/p278 | / peptide 278                                                    | Sigma |          |
| HSP65/p3   | / peptide 3                                                      | Sigma |          |
| HSP70      | 70 kDa heat shock protein, human                                 | Sigma | H8778    |
| HSP70/p10  | / peptide 10                                                     | Sigma |          |
| HSP70/p11  | / peptide 11                                                     | Sigma |          |
| HSP70/p12  | / peptide 12                                                     | Sigma |          |
| HSP70/p13  | / peptide 13                                                     | Sigma |          |
| HSP70/p14  | / peptide 14                                                     | Sigma |          |
| HSP70/p17  | / peptide 17                                                     | Sigma |          |
| HSP70/p18  | / peptide 18                                                     | Sigma |          |
| HSP70/p2   | / peptide 2                                                      | Sigma |          |
| HSP70/p20  | / peptide 20                                                     | Sigma |          |
| HSP70/p22  | / peptide 22                                                     | Sigma |          |
| HSP70/p23  | / peptide 23                                                     | Sigma |          |
| HSP70/p24  | / peptide 24                                                     | Sigma |          |
| HSP70/p26  | / peptide 26                                                     | Sigma |          |
| HSP70/p28  | / peptide 28                                                     | Sigma |          |
| HSP70/p29  | / peptide 29                                                     | Sigma |          |

|                  |                                              |         |           |
|------------------|----------------------------------------------|---------|-----------|
| HSP70/p3         | / peptide 3                                  | Sigma   |           |
| HSP70/p30        | / peptide 30                                 | Sigma   |           |
| HSP70/p31        | / peptide 31                                 | Sigma   |           |
| HSP70/p32        | / peptide 32                                 | Sigma   |           |
| HSP70/p33        | / peptide 33                                 | Sigma   |           |
| HSP70/p36        | / peptide 36                                 | Sigma   |           |
| HSP70/p37        | / peptide 37                                 | Sigma   |           |
| HSP70/p4         | / peptide 4                                  | Sigma   |           |
| HSP70/p5         | / peptide 5                                  | Sigma   |           |
| HSP70/p6         | / peptide 6                                  | Sigma   |           |
| HSP70/p8         | / peptide 8                                  | Sigma   |           |
| HSP70/p9         | / peptide 9                                  | Sigma   |           |
| HSP71            | 71 kDa heat shock protein, M. tuberculosis   | Enco    | SPP-885B  |
| HSP90            | from bovine brain                            | Sigma   | H6774     |
| human Albumin    | Serum Albumin, human, globulin free          | Sigma   | A8763     |
| human IgG        | tech grade                                   | Sigma   | I8664     |
| human IgM        | reagent grade                                | Sigma   | I8260     |
| IFNg             | Interferong, hum recomb                      | Sigma   | I3265     |
| IGFBP            | Insulin-like Growth Factor Binding Protein 2 | Sigma   | I5403     |
| IL-10            | Interleukin-10                               | Cytolab | 200-10-2  |
| IL-12            | Interleukin-12                               | Cytolab | 200-12-2  |
| IL-15            | Interleukin-15                               | Cytolab | 200-15-2  |
| IL-2             | Interleukin-2, human                         | Cytolab | 200-02-10 |
| IL21             | recomb.                                      | Enco    | PHC0214   |
| IL-2R a-chain/p1 | IL-2 Receptor a-chain/peptide 1              | Sigma   |           |
| IL-2R a-chain/p2 | IL-2 Receptor a-chain/peptide 2              | Sigma   |           |
| IL-2R b-chain/p1 | IL-2 Receptor b-chain / peptide 1            | Sigma   |           |



|                 |                                       |         |             |
|-----------------|---------------------------------------|---------|-------------|
| IL-4            | Interleukin-4, human                  | Cytolab | 200-04-2    |
| IL-5            | Interleukin-5, human                  | Cytolab | 200-05-2    |
| IL-6            | Interleukin-6, human                  | Cytolab | 200-06-2    |
| IL-8            | h rec                                 | Sigma   | I 1645      |
| Insulin         | HUMAN RECOMBINANT                     | Sigma   | I0259 I2643 |
| Insulin chain A | oxidized ammonium salt                | Sigma   | I1633       |
| Insulin chain B | oxidized from bovine pancreas         | Sigma   | I6383       |
| KLH             | Keyhole Lympe Hemocyanin              | Sigma   | H7017       |
| Lactoferrin     |                                       | Enco    | 151535      |
| Laminin         | from human placenta                   | Sigma   | L6274       |
| LDL             | Lipoprotein, Low Density              | Sigma   | L7914       |
| LHRH            | Luteinizing Hormone-Releasing Hormone | Sigma   | L4897       |
| Lipid A sm      | Lipid A, S. minessotta                | Sigma   | L6895       |
| LPS             | E. coli                               | Sigma   | L3755       |
| MAGE1           |                                       | Enco    | PRO-311 (A) |
| MART1           |                                       | Enco    | PRO-299     |
| MBP             | Myelin Basic Protein, guinea pig      | Sigma   | M2295       |
| MBP rat         | Myelin Basic Protein, rat             | Enco    | H-1964.0001 |
| melanin         | Melanin concentrating hormone         | Sigma   | M4542       |
| Melanostatin    | Pro-Leu_Gly amide                     | Sigma   | P9887       |
| melatonin       | Crystalline                           | Sigma   | M5250       |
| met BSA         | methylated Serum Albumin, bovine      | Sigma   | A1009       |
| MIF             |                                       | Enco    | 4282-PO1    |
| Mig (CXCL9)     | monokine induced by interferon gamma  | Enco    | PHC1604     |
| MMP1            | human tissue                          | Sigma   | M1802       |
| MMP2            |                                       | Sigma   | M7942       |
| MMP3            |                                       | Sigma   | M1677       |

|                            |                                                    |          |               |
|----------------------------|----------------------------------------------------|----------|---------------|
| MMP9                       |                                                    | Sigma    | M4809         |
| MOBP/p78-89                | Myelin-Associated Oligodendrocytic Basic Protein   | Sigma    |               |
| MOG                        | Myelin Oligodendrocyte Glycoprotein, mouse         | Enco     | H-4184-0500   |
| MOG/p35-55                 | Myelin Oligodendrocyte Glycoprotein, mouse/p35-55  | Enco     | H5912-0500    |
| MOG/p94-116                | Myelin Oligodendrocyte Glycoprotein, mouse/p94-116 | Sigma    |               |
| mouse IgG                  | technical grade                                    | Sigma    | I8765         |
| Mouse IgM, Kappa           | ABPC22                                             | Sigma    | M3795         |
| Mouse IL-10                | recomb.                                            | Bactolab | PMG550070     |
| Mouse IL-12                | Recombinant                                        | Bactolab | PG554592      |
| Mouse IL-12, P40           | Recombinant                                        | Bactolab | PMG554594     |
| MUC1                       | mucin                                              | Enco     | 155742        |
| Myeloperoxidase            | hum leucocytes                                     | Sigma    | M6908         |
| Myoglobin                  | human heart                                        | Sigma    | M6036         |
| Myosin                     | (bovine muscle) rabbit muscle instead              | Sigma    | M6643?? M1836 |
| Neuropeptide Y             |                                                    | Sigma    | N5017         |
| Neurotensin acetate        |                                                    | Sigma    | N6383         |
| OVA                        | Ovoalbumin                                         | Sigma    | A5378         |
| Oxytocin                   |                                                    | Sigma    | O3251         |
| Pepstatin                  | A, microbial source                                | Sigma    | P5318         |
| Peroxidase                 | horseradish                                        | Sigma    | P6782         |
| Phosphatidyl-ethanol-amine | Type 1                                             | Sigma    | P9137         |
| Phospholipase D            |                                                    | Sigma    | P4912         |
| Plasmin                    |                                                    | Sigma    | P1867         |
| PLP                        | Proteolipid Protein                                | Enco     | 6420-5150     |
| Poly arginine              |                                                    | Sigma    | P3892         |

|                      |                                              |          |               |
|----------------------|----------------------------------------------|----------|---------------|
| Poly D- lysine       |                                              | Sigma    | P4408         |
| Poly L-aspartic acid |                                              | Sigma    | P6762         |
| Poly L-glutamate     |                                              | Sigma    | P4636         |
| PPD                  | Purified Protein Derivative, M. tuberculosis | Enco     | P-1000-001    |
| Proinsulin           |                                              | Enco     | VCBVB-612     |
| Protamine Sulfate    |                                              | Sigma    | P4020         |
| Protease 133         |                                              | Enco     | 150210        |
| PT                   | Pertussis Toxin                              | Sigma    | P2980         |
| PTH                  | Parathyroid Hormone                          | Sigma    | P7036         |
| PTHrP                |                                              | Enco     | H-6630-0.500  |
| Rat anti mouse IL-10 | Purified, biotinilated                       | Bactolab | PMG554423     |
| rat IgG              |                                              | Sigma    | I4131         |
| Ribonuclease         |                                              | Sigma    | R4875         |
| SOD                  | Super Oxide Dismutase                        | Sigma    | S9636         |
| Somatostatin         |                                              | Sigma    | S1763         |
| Spectrin             | hum erythrocytes                             | Sigma    | S3644         |
| ssDNA                | single stranded DNA                          | Sigma    | D8899         |
| Substance P          |                                              | Sigma    | S6883         |
| Synuclein            | alpha                                        | Enco     | H00006622-PO1 |
| TCR bchain/pC2C      | / peptide C2C                                | Sigma    |               |
| TCR bchain/pMED12    | / peptide MED12                              | Sigma    |               |
| TCR bchain/pN12      | TCR bchain / peptide N12                     | Sigma    |               |
| TCR-CDR3-pC9         |                                              | Sigma    |               |
| TGF-beta             |                                              | Enco     | PHG9104       |
| Thrombin             | human plasma                                 | Sigma    | T6884         |
| Thyrocalcitonin      | human                                        | Sigma    | T3535         |
| Thyroglobulin        | bovine                                       | Sigma    | T1001         |

|                  |                                          |       |             |
|------------------|------------------------------------------|-------|-------------|
| TNF              | Tumor Necrosis Factor - alpha            | Enco  | PHP051      |
| TNFR             | Tumor Necrosis Factor Receptor,h recomb. | Enco  | PHP131      |
| Transferrin      | human, holo-transferrin                  | Sigma | T4132       |
| Transglutaminase | human reco                               | Enco  | PRO-308 (A) |
| Tropomyosin      | bovine muscle                            | Sigma | T2400       |
| Troponin         | from porcine muscle                      | Sigma | T2275       |
| Tubulin          |                                          | Enco  | 9280-3050   |
| Tyrosinase       | mushroom                                 | Sigma | T3824       |
| Ubiquitin        | bovine RBC                               | Sigma | U6253       |
| Vasopresin       |                                          | Sigma | V0377       |
| Vimentin         | bovine lens                              | Sigma | V4383       |
| VIP              | Vasointestinal Peptide                   | Enco  | 064-21      |
| Vitronectin      | from human plasma                        | Sigma | V8379       |
