# Supplementary material for: Network Theory Analysis of Antibody-Antigen Reactivity Data: The Immune Trees at Birth and Adulthood
Source: PLoS One. 2011 Mar 8;6(3):e17445. doi: 10.1371/journal.pone.0017445 (PMC3050881; doi:10.1371/journal.pone.0017445)
Supplement: Supporting Information S7 — The central nodes – the network hubs. (DOC) [file pone.0017445.s018.doc]

**Supporting Information**

**Network Theory Analysis of Antibody-Antigen Reactivity Data: The Immune Trees at Birth and Adulthood**

Asaf Madi1,2,*, Dror Y. Kenett1,*, Sharron Bransburg-Zabary1,2, Yifat Merbl3,4, Francisco J. Quintana3,5, Alfred I. Tauber6, Irun R. Cohen3,#, and Eshel Ben-Jacob1,7,#

**Supporting Information S7: The central nodes – the network hubs**

Figure S5 shows node centrality – hubs – in descending order for the IgG and IgM antigen-reactivity networks of the mothers and cords.

Zipf plots of the node centrality values (Figure S6):

Semi-log plots of the above datasets (Figure S7):

Figure S8 shows the Zipf plots of the descending sorted eigenvalues of the correlation matrices (absolute values):

Figure S9 shows the Zipf plots of the descending sorted eigenvalues of the correlation matrices of the integrated isotypes (absolute values):
